# Supplementary material for: Supramolecular high-aspect ratio assemblies with strong antifungal activity
Source: Springer Nature journal article supplement (doi:10.1038/ncomms3861), 2013-12-09
Supplement: 41467_2013_BFncomms3861_MOESM5_ESM.mol [file 41467_2013_BFncomms3861_MOESM5_ESM.mol]

  ChemDraw11181309132D

 58 58  0  0  0  0  0  0  0  0999 V2000
   -9.7053   -1.5769    0.0000 C   0  0  0  0  0  0  0  0  0  0  0  0
   -8.9932   -1.9935    0.0000 O   0  5  0  0  0  0  0  0  0  0  0  0
   -9.7053   -0.7519    0.0000 O   0  0  0  0  0  0  0  0  0  0  0  0
  -10.4221   -1.9853    0.0000 C   0  0  0  0  0  0  0  0  0  0  0  0
    9.5745    1.5751    0.0000 C   0  0  0  0  0  0  0  0  0  0  0  0
    8.8600    1.9876    0.0000 O   0  5  0  0  0  0  0  0  0  0  0  0
    9.5745    0.7501    0.0000 O   0  0  0  0  0  0  0  0  0  0  0  0
   10.2890    1.9876    0.0000 C   0  0  0  0  0  0  0  0  0  0  0  0
    1.8457    1.6173    0.0000 O   0  0  0  0  0  0  0  0  0  0  0  0
    1.8457    0.7923    0.0000 C   0  0  0  0  0  0  0  0  0  0  0  0
    2.5602    0.3798    0.0000 N   0  0  0  0  0  0  0  0  0  0  0  0
    3.2748    0.7923    0.0000 C   0  0  0  0  0  0  0  0  0  0  0  0
    3.9892    0.3798    0.0000 C   0  0  0  0  0  0  0  0  0  0  0  0
    3.9892   -0.4488    0.0000 C   0  0  0  0  0  0  0  0  0  0  0  0
    4.7059   -0.8566    0.0000 C   0  0  0  0  0  0  0  0  0  0  0  0
    5.4160   -0.4447    0.0000 C   0  0  0  0  0  0  0  0  0  0  0  0
    6.1304   -0.8572    0.0000 N   0  0  0  0  0  0  0  0  0  0  0  0
    6.8449   -0.4447    0.0000 C   0  0  0  0  0  0  0  0  0  0  0  0
    6.8449    0.3804    0.0000 O   0  0  0  0  0  0  0  0  0  0  0  0
    7.5594   -0.8572    0.0000 N   0  0  0  0  0  0  0  0  0  0  0  0
    8.2738   -0.4447    0.0000 C   0  0  0  0  0  0  0  0  0  0  0  0
    8.9884   -0.8572    0.0000 C   0  0  0  0  0  0  0  0  0  0  0  0
    9.7029   -0.4447    0.0000 C   0  0  0  0  0  0  0  0  0  0  0  0
   10.4174   -0.8572    0.0000 C   0  0  0  0  0  0  0  0  0  0  0  0
   11.1318   -0.4447    0.0000 N   0  3  0  0  0  0  0  0  0  0  0  0
    5.4160    0.3798    0.0000 C   0  0  0  0  0  0  0  0  0  0  0  0
    4.7037    0.7923    0.0000 C   0  0  0  0  0  0  0  0  0  0  0  0
    1.1312    0.3798    0.0000 C   0  0  0  0  0  0  0  0  0  0  0  0
    1.1312   -0.4452    0.0000 C   0  0  0  0  0  0  0  0  0  0  0  0
    0.4213   -0.8569    0.0000 C   0  0  0  0  0  0  0  0  0  0  0  0
   -0.2949   -0.4489    0.0000 C   0  0  0  0  0  0  0  0  0  0  0  0
   -1.0094   -0.8614    0.0000 C   0  0  0  0  0  0  0  0  0  0  0  0
   -1.0094   -1.6865    0.0000 O   0  0  0  0  0  0  0  0  0  0  0  0
   -1.7239   -0.4489    0.0000 N   0  0  0  0  0  0  0  0  0  0  0  0
   -2.4383   -0.8614    0.0000 C   0  0  0  0  0  0  0  0  0  0  0  0
   -3.1529   -0.4489    0.0000 C   0  0  0  0  0  0  0  0  0  0  0  0
   -3.1529    0.3795    0.0000 C   0  0  0  0  0  0  0  0  0  0  0  0
   -3.8696    0.7875    0.0000 C   0  0  0  0  0  0  0  0  0  0  0  0
   -4.5797    0.3754    0.0000 C   0  0  0  0  0  0  0  0  0  0  0  0
   -5.2941    0.7879    0.0000 N   0  0  0  0  0  0  0  0  0  0  0  0
   -6.0086    0.3754    0.0000 C   0  0  0  0  0  0  0  0  0  0  0  0
   -6.0086   -0.4496    0.0000 O   0  0  0  0  0  0  0  0  0  0  0  0
   -6.7231    0.7879    0.0000 N   0  0  0  0  0  0  0  0  0  0  0  0
   -7.4375    0.3754    0.0000 C   0  0  0  0  0  0  0  0  0  0  0  0
   -8.1520    0.7879    0.0000 C   0  0  0  0  0  0  0  0  0  0  0  0
   -8.8666    0.3754    0.0000 C   0  0  0  0  0  0  0  0  0  0  0  0
   -9.5811    0.7879    0.0000 C   0  0  0  0  0  0  0  0  0  0  0  0
  -10.2955    0.3754    0.0000 N   0  3  0  0  0  0  0  0  0  0  0  0
   -4.5797   -0.4489    0.0000 C   0  0  0  0  0  0  0  0  0  0  0  0
   -3.8674   -0.8614    0.0000 C   0  0  0  0  0  0  0  0  0  0  0  0
   -0.2949    0.3794    0.0000 C   0  0  0  0  0  0  0  0  0  0  0  0
    0.4195    0.7916    0.0000 C   0  0  0  0  0  0  0  0  0  0  0  0
   11.0011    1.5765    0.0000 F   0  0  0  0  0  0  0  0  0  0  0  0
   10.7001    2.6997    0.0000 F   0  0  0  0  0  0  0  0  0  0  0  0
    9.8779    2.6997    0.0000 F   0  0  0  0  0  0  0  0  0  0  0  0
  -11.1318   -1.5701    0.0000 F   0  0  0  0  0  0  0  0  0  0  0  0
  -10.8373   -2.6950    0.0000 F   0  0  0  0  0  0  0  0  0  0  0  0
  -10.0151   -2.6997    0.0000 F   0  0  0  0  0  0  0  0  0  0  0  0
  4  1  1  0      
  1  2  1  0      
  1  3  2  0      
  8  5  1  0      
  5  6  1  0      
  5  7  2  0      
 10  9  2  0      
 10 11  1  0      
 11 12  1  0      
 12 13  1  0      
 13 14  1  0      
 14 15  2  0      
 15 16  1  0      
 16 17  1  0      
 17 18  1  0      
 18 19  2  0      
 18 20  1  0      
 20 21  1  0      
 21 22  1  0      
 22 23  1  0      
 23 24  1  0      
 24 25  1  0      
 16 26  2  0      
 27 26  1  0      
 13 27  2  0      
 28 10  1  0      
 29 28  2  0      
 30 29  1  0      
 31 30  2  0      
 31 32  1  0      
 32 33  2  0      
 32 34  1  0      
 34 35  1  0      
 35 36  1  0      
 36 37  1  0      
 37 38  2  0      
 38 39  1  0      
 39 40  1  0      
 40 41  1  0      
 41 42  2  0      
 41 43  1  0      
 43 44  1  0      
 44 45  1  0      
 45 46  1  0      
 46 47  1  0      
 47 48  1  0      
 39 49  2  0      
 50 49  1  0      
 36 50  2  0      
 51 31  1  0      
 52 51  2  0      
 28 52  1  0      
  8 53  1  0      
  8 54  1  0      
  8 55  1  0      
  4 56  1  0      
  4 57  1  0      
  4 58  1  0      
M  CHG  4   2  -1   6  -1  25   1  48   1
M  END
